# Supplementary material for: Treatment of autosomal dominant retinitis pigmentosa caused by RHO-P23H mutation with high-fidelity Cas13X in mice
Source: PubMed Central journal article supplement — Mol Ther Nucleic Acids. 2023 Aug 7;33:750–61. doi: 10.1016/j.omtn.2023.08.002 (PMC10445100; doi:10.1016/j.omtn.2023.08.002), 2023-08-07
Supplement: mmc1.pdf [file mmc1.pdf]

## **Supplemental information**

### **Treatment of autosomal dominant retinitis pigmentosa caused by RHO-P23H mutation with high-fidelity Cas13X in mice**

**Zixiang Yan, Yuqin Yao, Luyao Li, Lingqiong Cai, Haiwei Zhang, Shenghai Zhang, Qingquan Xiao, Xing Wang, Erwei Zuo, Chunlong Xu, Jihong Wu, and Hui Yang**

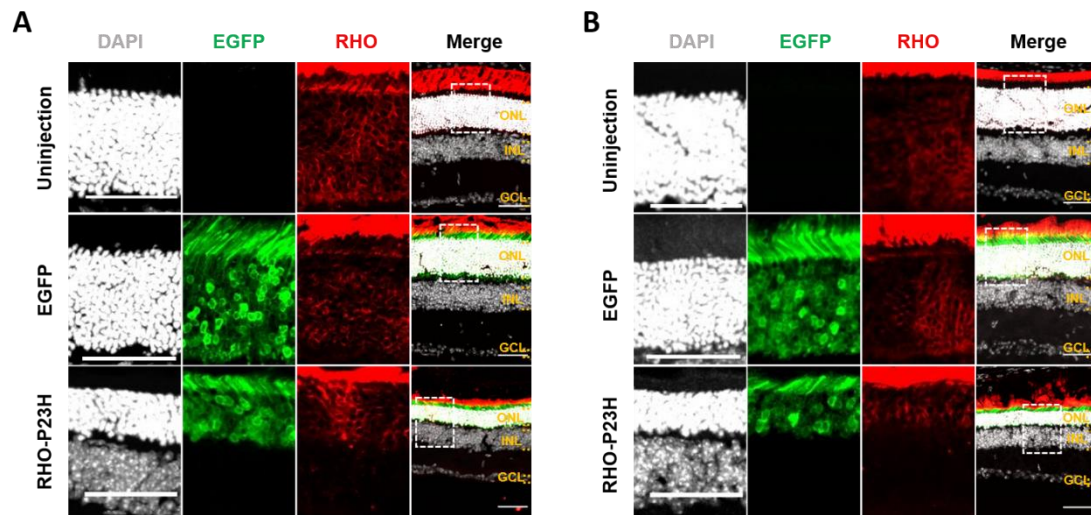

Figure S1. Human RHO-P23H overexpression in C57BL/6 mice.

(A) Representative images of ten-week-old C57BL/6 retinas uninjected or injected with AAV-EGFP and AAV-RHO(P23H)-T2A-EGFP, respectively. (B) Representative images of twelve-week-old C57BL/6 retinas uninjected or injected with AAV-EGFP and AAV-RHO(P23H)-T2A-EGFP, respectively. Individual channels zoomed in from the dashed boxes in the corresponding merged images. Scale bar, 50  $\mu$ m. ONL, outer nuclear layer; INL, inner nuclear layer; GCL, ganglion cell layer.

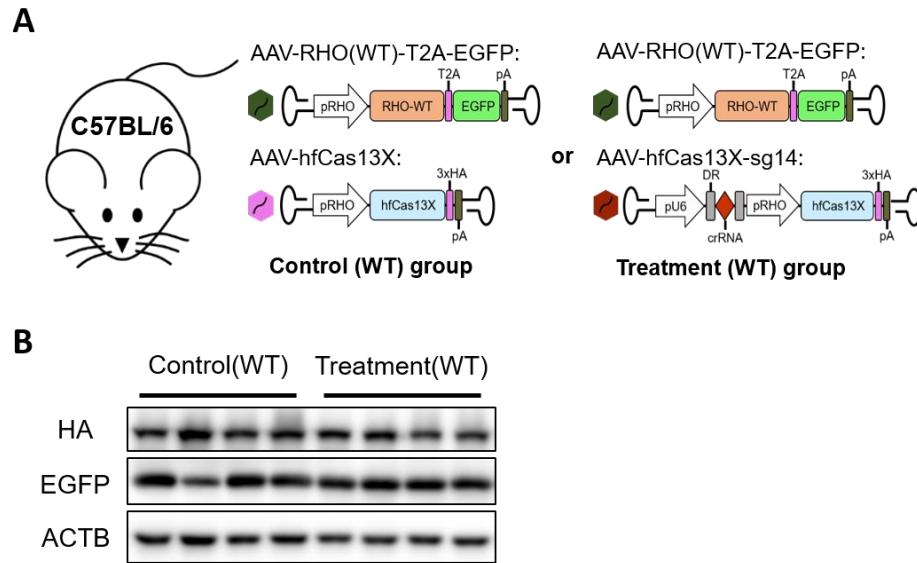

Figure S2. Human RHO-WT was not affected by hfCas13X *in vivo*.

(A) Schematic diagram of strategy for experiments of human RHO-WT knockdown in C57BL/6 mice. (B) Western blot of eight-week-old C57BL/6 retinas injected with AAVs of control (WT), and treatment (WT) groups, respectively. Each group presented four retinas.

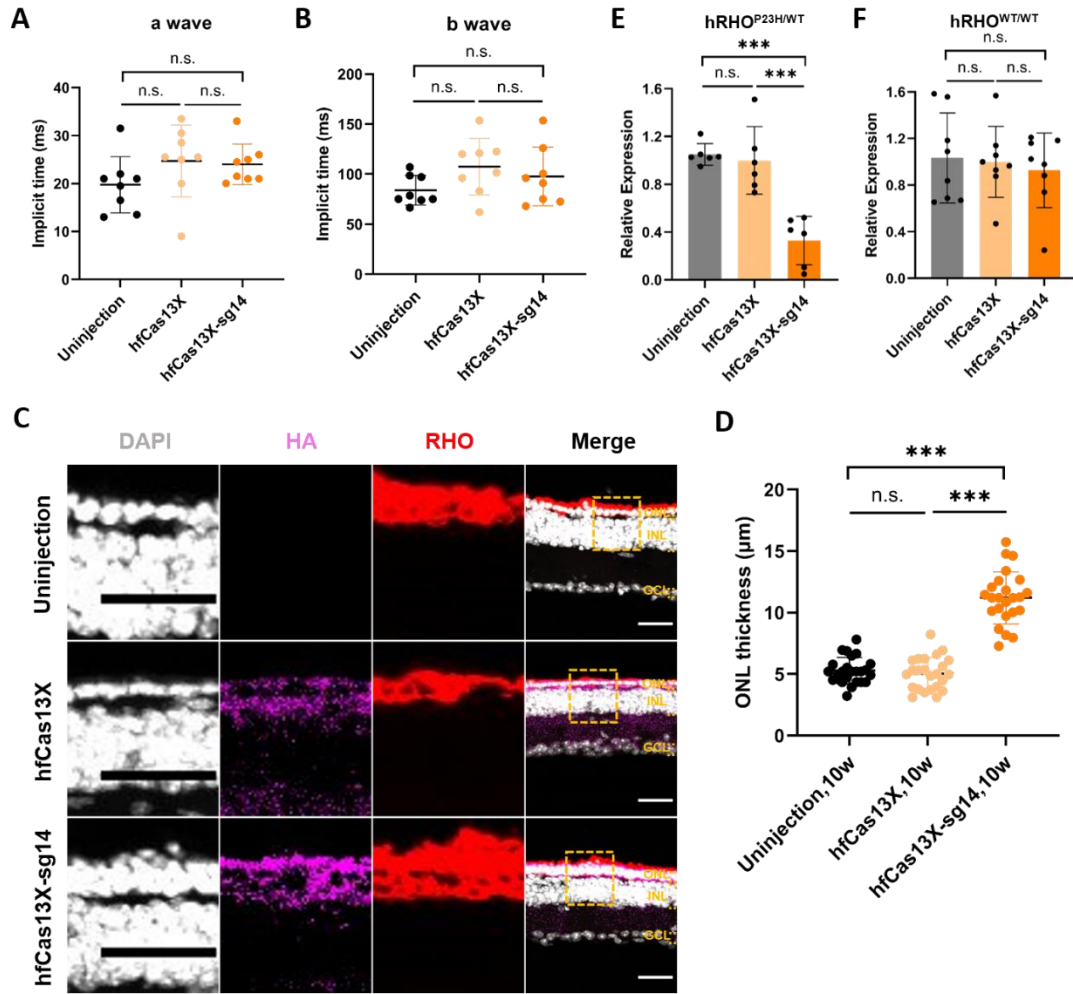

Figure S3. Treatment of humanized hRHO<sup>P23H/WT</sup> mice with hfCas13X.

(A) Implicit time statistics of a-wave of four-week-old hRHO<sup>P23H/WT</sup> mice uninjected or injected with AAV-hfCas13X and AAV-hfCas13X-sg14, respectively. n.s., not significant; one-way ANOVA test. Eight retinas for each group. (B) Implicit time statistics of b-wave of four-week-old hRHO<sup>P23H/WT</sup> mice uninjected or injected with AAV-hfCas13X and AAV-hfCas13X-sg14, respectively. n.s., not significant; one-way ANOVA test. Eight retinas for each group. (C) Representative images of ten-week-old hRHO<sup>P23H/WT</sup> retinas uninjected or injected with AAV-hfCas13X and AAV-hfCas13X-sg14, respectively. Individual channels zoomed in from the dashed boxes in the corresponding merged images. Scale bar, 30 μm. ONL, outer nuclear layer; INL, inner

nuclear layer; GCL, ganglion cell layer. (D) ONL thickness statistics of ten-week-old hRHO<sup>P23H/WT</sup> retinas uninjected or injected with AAV-hfCas13X and AAV-hfCas13X-sg14, respectively. \*\*\*,  $P < 0.001$ ; n.s., not significant; one-way ANOVA test. Six retinas for each group. (E) Relative degradation of total RHO transcripts induced by hfCas13X-sg14 in hRHO<sup>P23H/WT</sup> mice. \*\*\*,  $P < 0.001$ ; n.s., not significant; one-way ANOVA test. Gene expression was relative to the hfCas13X group. Six retinas for each group. (F) Relative expression of total RHO transcripts in hRHO<sup>WT/WT</sup> mice infected by AAV-hfCas13X-sg14. n.s., not significant; one-way ANOVA test. Gene expression was relative to the hfCas13X group. Eight retinas for each group.
